# Supplementary material
Source: Royal Society of Chemistry journal article supplement (doi:10.1039/d6gc01695b)
Supplement: d6gc01695b1.pdf [file d6gc01695b1.pdf]

## Supplementary Information

# Depolymerized Lignin as an Enabler for Superior Lignin–Acrylonitrile Copolymers for Sustainable Wet-spun Fibers

Talita Nascimento<sup>1</sup>, Marta Ramos-Andrés<sup>1,2\*</sup>, Marta C. Lourenço<sup>1</sup>, Ana C. Marques<sup>3\*</sup>

<sup>1</sup>Centro de Recursos Naturais e Ambiente (CERENA), Instituto Superior Técnico, Universidade de Lisboa, Avenida Rovisco Pais, 1049-001 Lisbon, Portugal

<sup>2</sup>Bieconomy Institute of the University of Valladolid (BioEcoUVa), PressTech Group, Department of Chemical Engineering and Environmental Technology, School of Industrial Engineering, University of Valladolid, Paseo Prado de la Magdalena 3-5, 47011 Valladolid, Spain

<sup>3</sup>CERENA, Department of Chemical Engineering, Instituto Superior Técnico, Universidade de Lisboa, Avenida Rovisco Pais, 1049-001 Lisbon, Portugal

### Calculation of incorporation fractions

Assuming the nitrogen content in the lignin (LB and/or DLB) structure negligible, the mass fraction of acrylonitrile (AN) incorporated into the copolymer was determined by comparing the nitrogen content of the copolymer to that of the pure PAN homopolymer measured by Elemental Analysis (EA).

$$I_{AN} = \frac{N_{Copolymer}}{N_{PAN}} \cdot 100 \quad \text{Equation (S1)}$$

$$I_{lignin} = 100 - I_{AN} \quad \text{Equation (S2)}$$

$I_{AN}$  = Incorporation fraction of AN into the copolymer (%)

$I_{lignin}$  = Incorporation fraction of DLB (or LB) into the copolymer (%)

$N_{copolymer}$  = Nitrogen content in the purified copolymer measured by EA (%)

$N_{PAN}$  = Nitrogen content in the pure PAN homopolymer measured by EA (%)

Calculation of conversions

The overall conversion of each monomer was calculated by mass balance, relating the mass of each component present in the final purified copolymer to its initial mass in the feed.

$$C_{AN} = \frac{m_{copolymer} \cdot (I_{AN}/100)}{m_{AN, initial}} \cdot 100 \quad \text{Equation (S3)}$$

$$C_{lignin} = \frac{m_{copolymer} \cdot (I_{lignin}/100)}{m_{lignin, initial}} \cdot 100 \quad \text{Equation (S4)}$$

$C_{AN}$  = Conversion of AN (%)

$C_{lignin}$  = Conversion of DLB (or LB) (%)  $m_{copolymer}$  = Final mass of the purified copolymer (g)

$m_{AN, initial}$  = Initial mass of acrylonitrile added to the reaction (g)

$m_{lignin, initial}$  = Initial mass of DLB (or LB) added to the reaction (g)

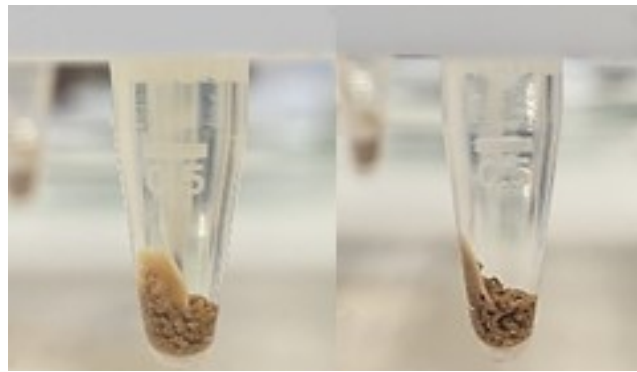

Figure SI.1- Purification of poly(AN-DLB)-3.4 copolymer with methanol.

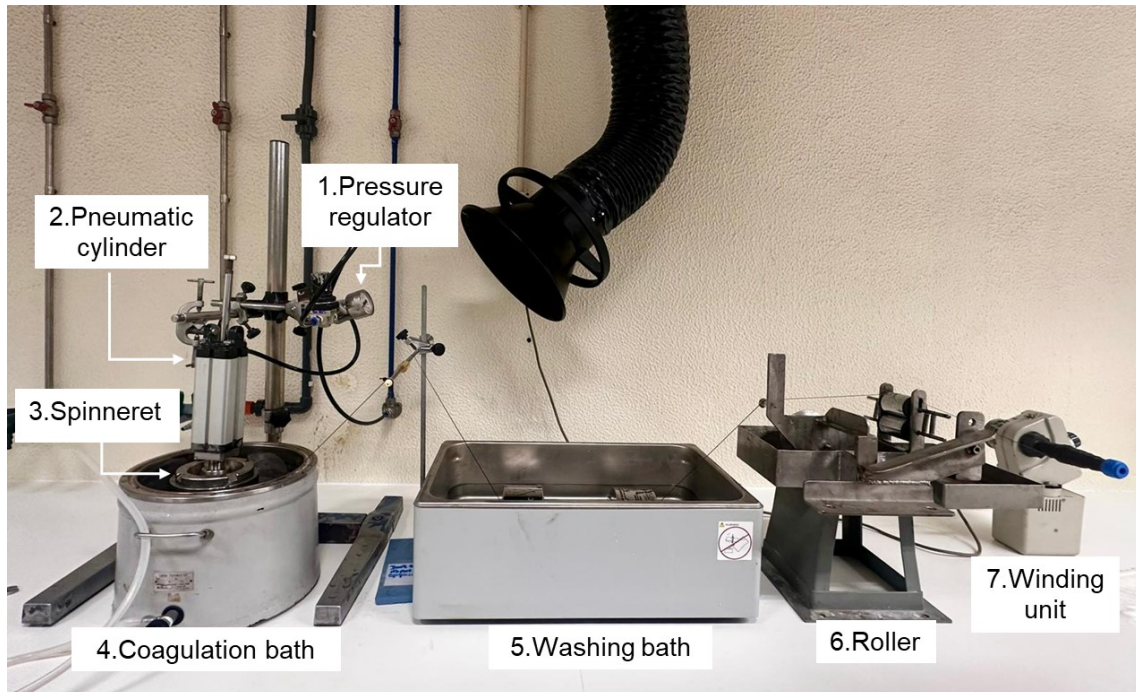

Figure SI.2- Laboratory wet-spinning line

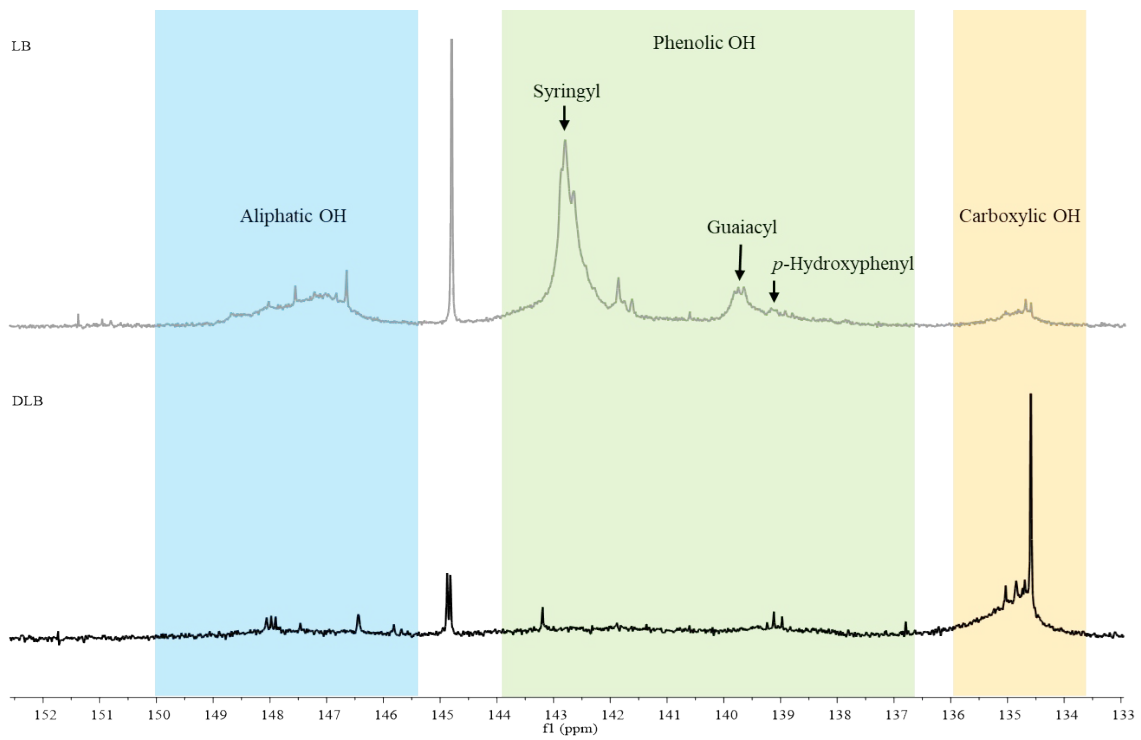

Figure SI.3 -  $^{31}\text{P}$  NMR spectra of LB and DLB and quantification of OH groups.

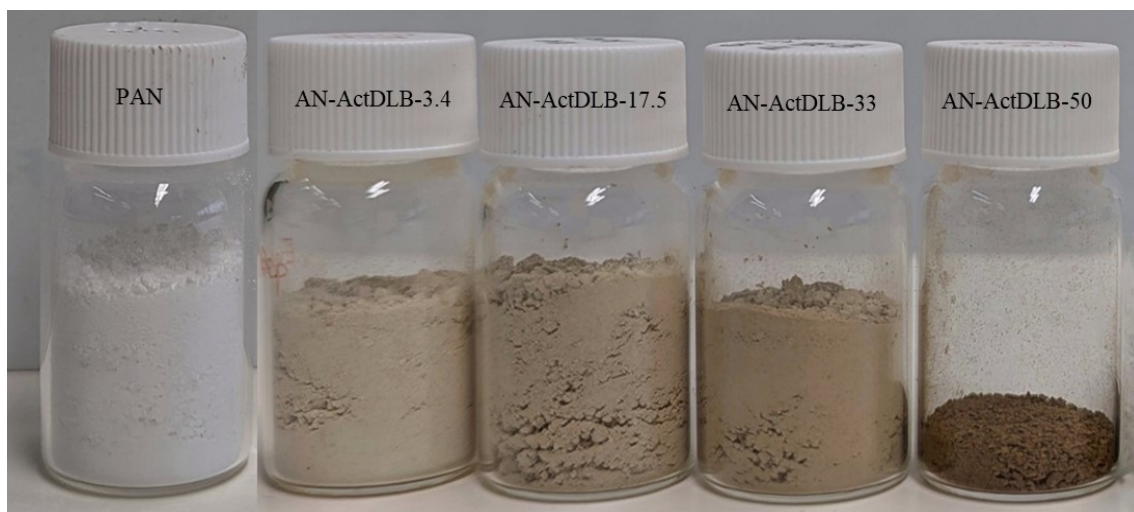

Figure SI.4- PAN and poly(AN-DLB) copolymers.

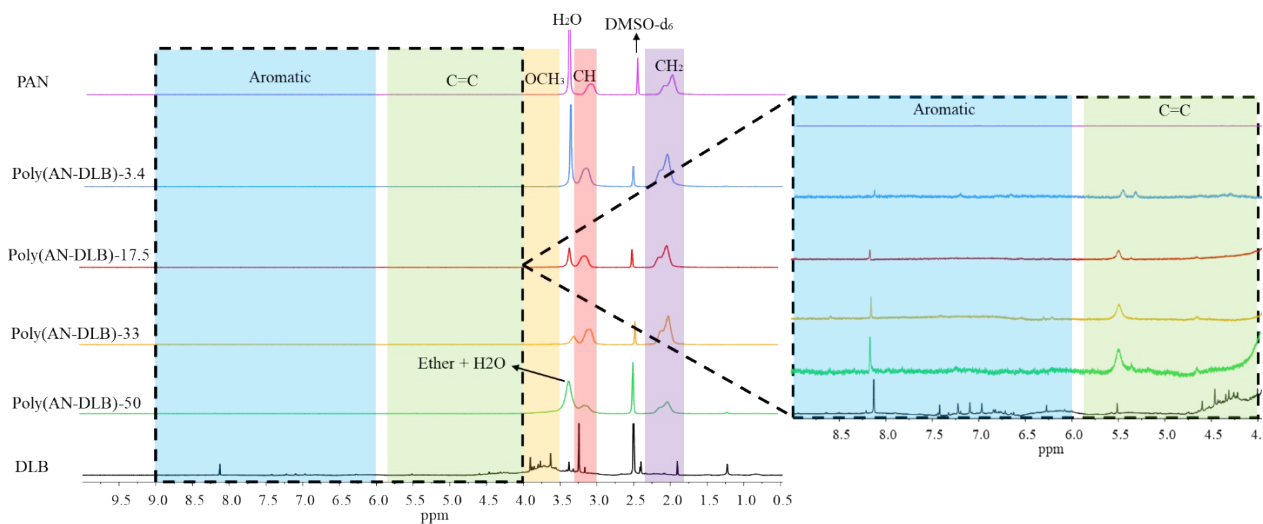

Figure SI.5 –  $^1\text{H}$  NMR spectra of spectra of PAN, copolymers, and DLB.

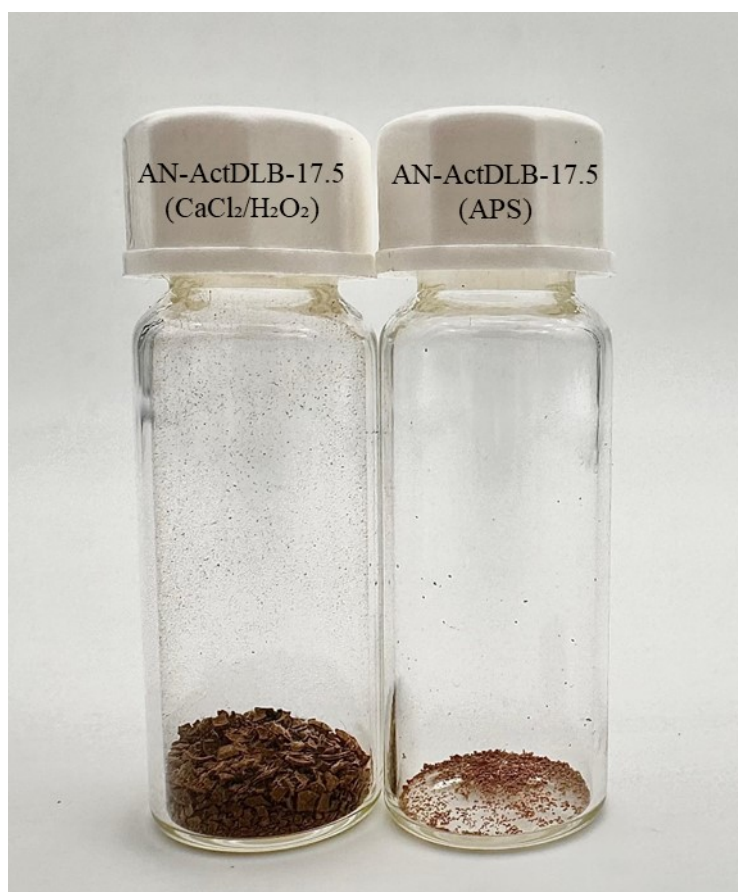

Figure SI.6 – Poly(AN-DLB)-17.5(APS) and poly(AN-DLB)-17.5( $\text{CaCl}_2/\text{H}_2\text{O}_2$ ) copolymers.

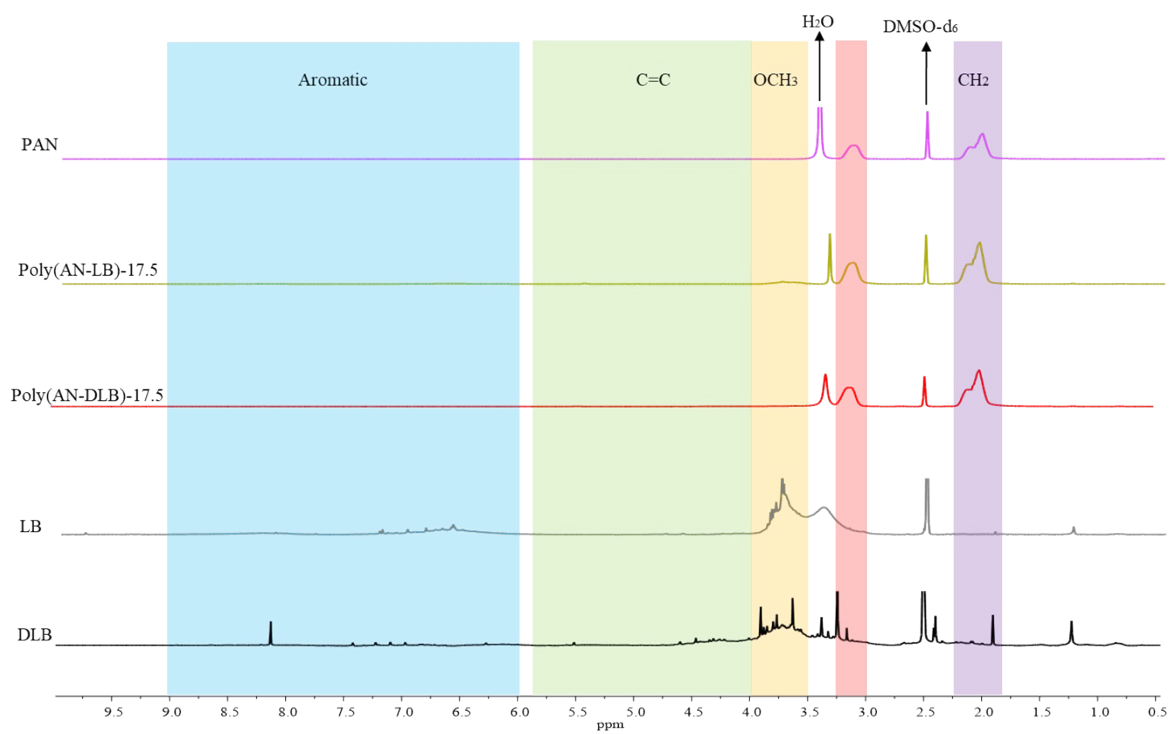

Figure SI.7- <sup>1</sup>H NMR of PAN, poly(AN-DLB)-17.5, poly(AN-DLB)-17.5, and DLB and quantification of functional groups.
